# Supplementary material
Source: publisher figshare collection journal article supplement (https://karger.figshare.com/ndownloader/files/14721020)

### Supplement Figure 1

The relationship of GM130 and ST6GalNAc-II. (A) Western blotting for ST6GalNAc-II expression in control group, negative control group and GM130-siRNA group, showed the ST6GalNAc-II protein expression level haven't significantly difference among those three groups. (B) Real time-PCR for ST6GalNAc-II expression in control group, negative control group and GM130-siRNA group, showed the ST6GalNAc-II gene level haven't significantly difference among those three groups.

## Supplement Fig 1

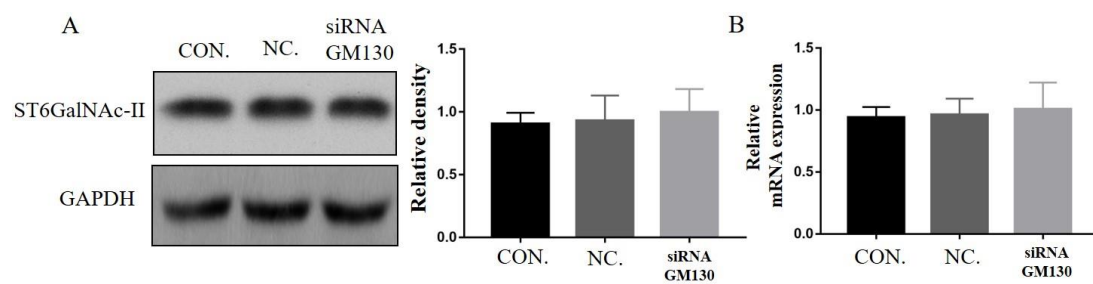

Supplement: Supplementary file 1 [file 14721020]
